# Supplementary material for: Flux growth of lead free (Na0.5Bi0.5)TiO3–(K0.5Bi0.5)TiO3 ferroelectric single crystals and their characterization
Source: Royal Society of Chemistry journal article supplement (doi:10.1039/c4ce00249k), 2014-01-01
Supplement: c4ce00249k1.pdf [file c4ce00249k1.pdf]

**Compositional analysis by EDAX** at three random positions over the surface of BNKT single crystal is tabulated below. The instrument used for the study is Jeol JSM 6610LV scanning electron microscope.

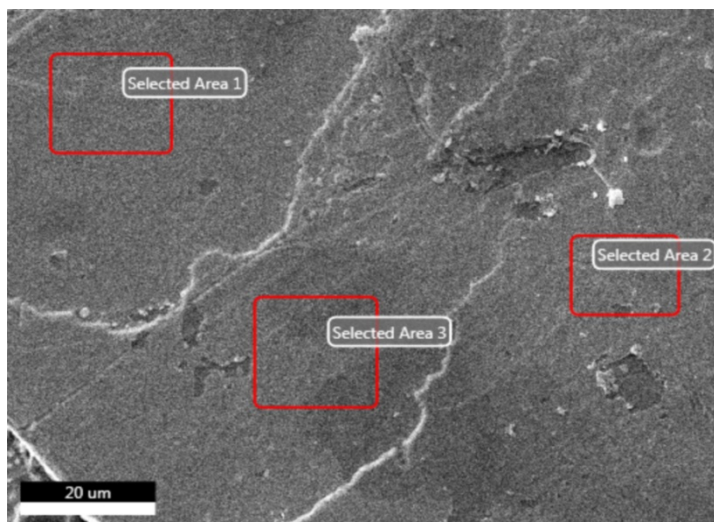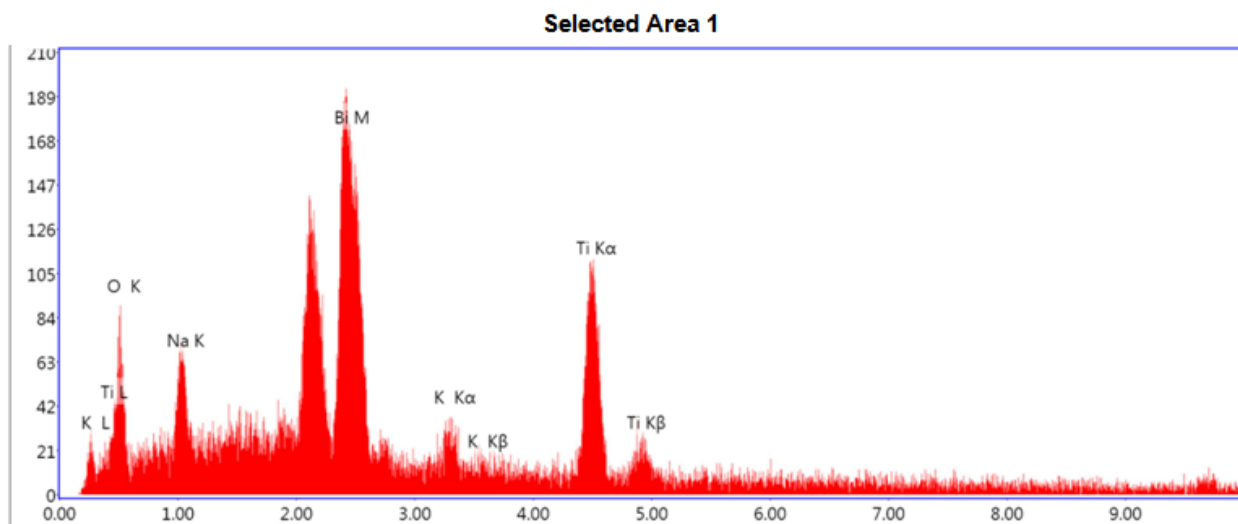

Selected Area 2

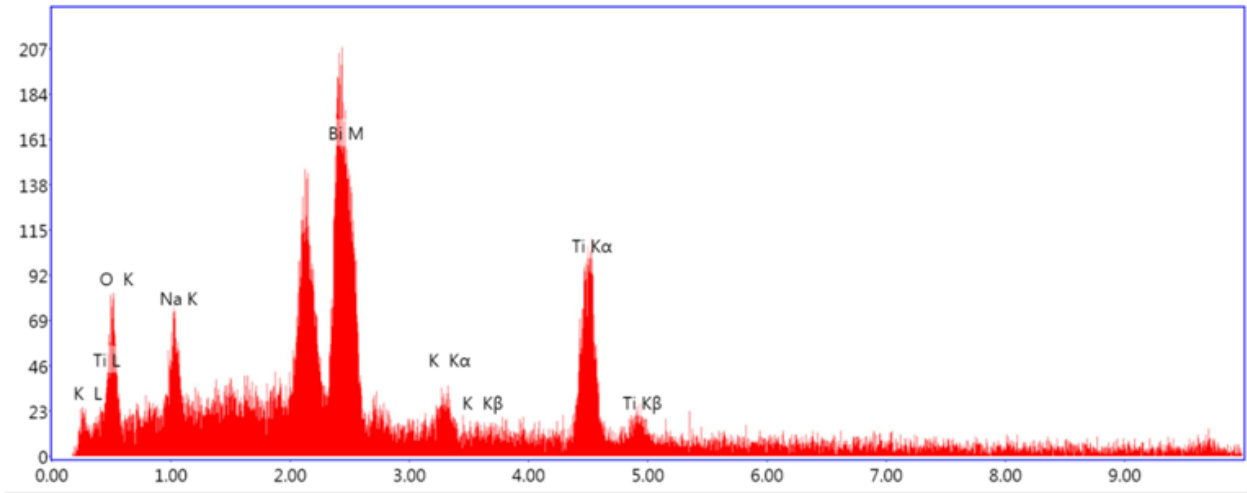

Selected Area 3

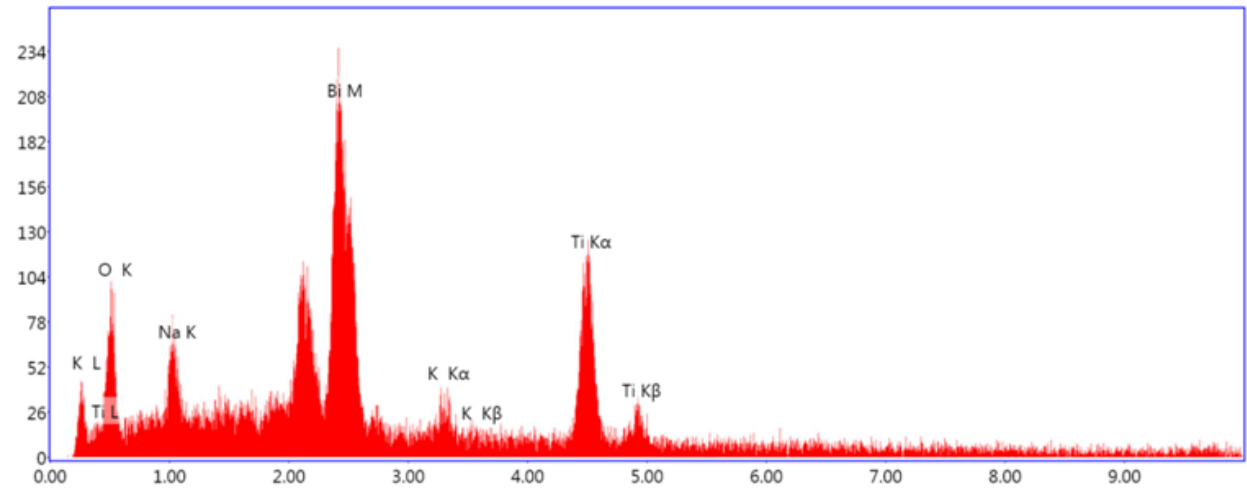

| S.No           | Elements (wt%) |             |              |              |              |
|----------------|----------------|-------------|--------------|--------------|--------------|
|                | K              | Na          | Bi           | Ti           | O            |
| 1.             | 2.57           | 8.53        | 39.41        | 27.01        | 22.48        |
| 2.             | 2.45           | 8.82        | 39.70        | 25.93        | 23.09        |
| 3.             | 2.04           | 7.61        | 39.53        | 26.07        | 24.75        |
| <b>AVERAGE</b> | <b>2.35</b>    | <b>8.32</b> | <b>39.56</b> | <b>26.33</b> | <b>23.44</b> |

On the basis of EDAX analysis, the concentration for the as-grown crystal was found to be  $0.77(\text{Bi}_{0.5}\text{Na}_{0.5})\text{TiO}_3 - 0.23(\text{K}_{0.5}\text{Bi}_{0.5})\text{TiO}_3$

Other References consulted for compositional analysis with similar elements present are as follows:

1. R. Sun et al. / J. Appl. Phys. 109, 124113 (2011): 0.92NBT-0.08KBT single crystals were obtained with a starting composition of 0.70NBT-0.30KBT powder.
2. S. Zlotnik et al./ Crystal Growth & Design, Vol. 10, No. 8 (2010) : K content of 17.41 at%.
3. Chen et al. / J. Appl. Phys. 108, 124106 (2010): NBBT94/6 single crystals were obtained from starting composition of NBBT88/12.
